# Supplementary material for: Lattice interconversion of 1D ferrocene-based perovskite induced by solvent molecules for selective photocatalytic toluene oxidation
Source: Royal Society of Chemistry journal article supplement (doi:10.1039/d5qi00148j), 2025-01-01
Supplement: d5qi00148j1.pdf [file d5qi00148j1.pdf]

Supporting Information

**Lattice interconversion of 1D ferrocene-based perovskite induced by solvent  
molecules for selectively photocatalytic toluene oxidation**

Yan-Li Yang,<sup>a,#</sup> Ke-Ke Guo,<sup>a,b,#</sup> Xue Bai,<sup>a</sup> An-Ge Zhang,<sup>a</sup> Ying Lu,<sup>a</sup> Mao-Chun Zhu,<sup>a</sup>  
and Shu-Xia Liu <sup>a\*</sup>

<sup>a</sup>Key Laboratory of Polyoxometalate and Reticular Material Chemistry of Ministry of Education, Faculty of Chemistry, Northeast Normal University, Changchun, Jilin 130024, P. R. China

<sup>b</sup>Key Laboratory of Eco-Functional Polymer Materials of the Ministry of Education, College of Chemistry and Chemical Engineering, Northwest Normal University, Lanzhou, Gansu 730070, P.R. China

<sup>#</sup>Y. Yang and K. Guo contributed equally to this work.

Email: [liusx@nenu.edu.cn](mailto:liusx@nenu.edu.cn)

## Materials and methods.

All chemical reagents and solvents were available commercially and used without further purification.  $\text{PbI}_2$  (98%) and N,N-Dimethylaminomethylferrocene ( $\text{C}_{13}\text{H}_{17}\text{FeN}$ ) (99%) were purchased from Energy Chemical. Hydroiodic acid (HI, 55%-58%), N,N-Diethylformamide (DEF, 99%), toluene (99%), *o*-xylene (98%), *m*-xylene (99%), *p*-xylene (99%), *p*-chlorotoluene (98%), 4-fluorotoluene (98%) and *p*-bromotoluene (99%) were purchased from Aladdin.

Powder X-ray diffraction (PXRD) patterns were collected on a Smartlab instrument using Cu K $\alpha$  radiation ( $\lambda = 1.5418 \text{ \AA}$ ) in the  $2\theta$  range  $5\text{--}50^\circ$  at a scan rate of  $10^\circ \text{ min}^{-1}$ . The solid diffuse reflectance UV-vis spectra of  $(\text{C}_{13}\text{H}_{17}\text{FeNH})\text{PbI}_3$  and  $(\text{C}_{13}\text{H}_{17}\text{FeNH})\text{PbI}_3/\text{DEF}$  were measured on a Cary7000 UV-Vis-NIR Spectrophotometer from 200 to 800 nm at room temperature. A barium sulfate ( $\text{BaSO}_4$ ) pellet was used as the standard with 100% reflectance. The steady-state photoluminescence (PL) emission spectroscopy, the temperature-dependent PL as well as the time-resolved photoluminescence (TRPL) spectra were measured by FLS980 with a 375 nm and 405 nm excitation light, respectively. The photoelectrochemical experiments were performed using a CHI 660 electrochemical workstation (Shanghai Chenhua Instrument Corp. China) at room temperature. A three-electrode system was employed in a quartz cell with a Pt wire as the counter electrode, a saturated calomel electrode (SCE) as the reference electrode, and the composite film-assembled FTO glass as the working electrode. The illumination area of working electrodes was set constant at  $1.0 \times 1.0 \text{ cm}^2$ . The transient photocurrent experiment was carried out at a

constant bias of 0.5 V under simulated sunlight irradiation conditions (300 W Xenon arc lamp,  $\lambda > 420$  nm,  $500 \text{ mW} \cdot \text{cm}^{-2}$ ) upon on-off cycling irradiation. Mott-Schottky plots was collected by measuring Impedance-Potential curves at the fixed frequency of 500 Hz and 1000 Hz, respectively. An aqueous solution of 0.5 M  $\text{Na}_2\text{SO}_4$  was used as the electrolyte throughout the experiments. The obtained potential (vs. SCE) was converted to  $E_{\text{RHE}}$  ( $E_{\text{NHE}}$  at pH = 0) by the equation  $E_{\text{RHE}} = E_{\text{SCE}} + 0.0592\text{pH} + 0.241$ .<sup>1</sup>

### X-Ray Crystallography

The crystallographic data of  $(\text{C}_{13}\text{H}_{17}\text{FeNH})\text{PbI}_3$  and  $(\text{C}_{13}\text{H}_{17}\text{FeNH})\text{PbI}_3 \cdot 10\text{DEF}$  were collected at 298.15 K using a Bruker Apex CCD diffractometer with Mo- $K\alpha$  radiation ( $\lambda=0.71073$  Å). By using SHELX programs via Olex2 interface,<sup>1-2</sup> the crystal structure of these two perovskite single crystals were solved by direct methods and further refined by full-matrix least-squares methods. All hydrogen atoms were placed in calculated positions and refined by using a riding model. All non-hydrogen atoms were refined anisotropically. The crystallographic data of  $(\text{C}_{13}\text{H}_{17}\text{FeNH})\text{PbI}_3 \cdot 10\text{DEF}$  and  $(\text{C}_{13}\text{H}_{17}\text{FeNH})\text{PbI}_3$  have been deposited in the Cambridge Crystallographic Data Centre with CCDC numbers 2416757 and 2379877, respectively. Pertinent crystal data and relevant refinement parameters for  $(\text{C}_{13}\text{H}_{17}\text{FeNH})\text{PbI}_3$  and  $(\text{C}_{13}\text{H}_{17}\text{FeNH})\text{PbI}_3 \cdot 10\text{DEF}$  are listed in Table S1.

### Density functional theory (DFT) calculations

The calculations were carried out using the DMOL3 (Density Functional Theory based Quantum Chemistry) software package. The Perdew-Burke-Ernzerhof (PBE) functional was used within the generalized gradient approximation (GGA). The double numerical plus polarization (DNP) basis set was employed for all atoms in the cluster. The orbital cutoff was set to 3.5 Å to ensure accurate treatment of the electron density near the cluster boundary. The energy convergence criterion was set to  $10 \times 10^{-5}$  eV/atom, the force convergence criterion was set to 0.002 eV/Å, and the maximum displacement criterion for geometry optimization was set to 0.005 Å. All calculations included spin polarization to accurately describe the magnetic properties of the system. For the geometry optimization, the BFGS algorithm was used.

#### AQE experiments

The apparent quantum efficiency (AQE) was conducted with a 365 nm LED light source (Perfectlight, PLS-LED) for 4 h. The average irradiation intensity was determined by a optical power meter. The number of incident photons (N) and AQE are calculated with the following equation.

$$N = \frac{E\lambda}{hc} = \frac{I \times A \times t \times \lambda}{hc}$$

$$N = \frac{\text{number of reacted photogenerated holes}}{\text{nuber of incident photons}}$$

$$= \frac{\text{number of reacted toluene}}{\text{nuber of incident photons}} = \frac{nN_A}{N}$$

Where I represents the light intensity of the 356 nm LED sorce, A is the irradiation area of reaction system, t is the time,  $\lambda$  is the wavelength of the light, h represents the Plank

constant,  $c$  is the speed of light,  $n$  is the amount of toluene reacted, and  $N_A$  is the Avogadro constant.

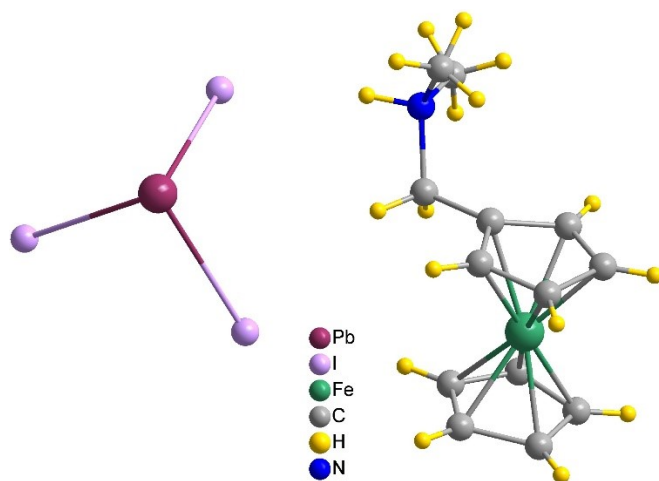

**Fig. S1** Basic structural motif of  $(C_{13}H_{17}FeNH)PbI_3$ .

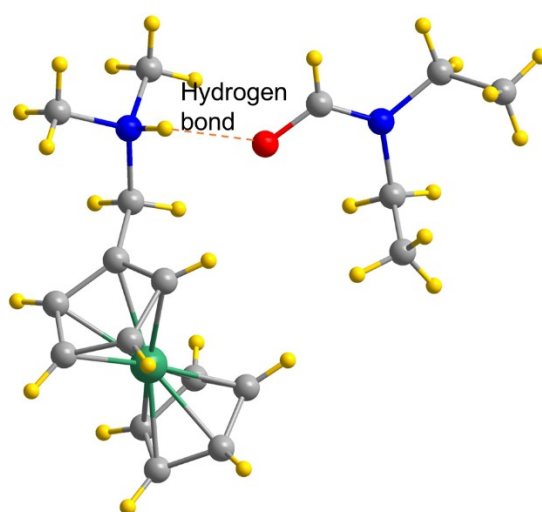

**Fig. S2** Hydrogen bonding interaction between DEF and  $C_{13}H_{17}FeNH$  in  $(C_{13}H_{17}FeNH)PbI_3 \cdot 10DEF$ .

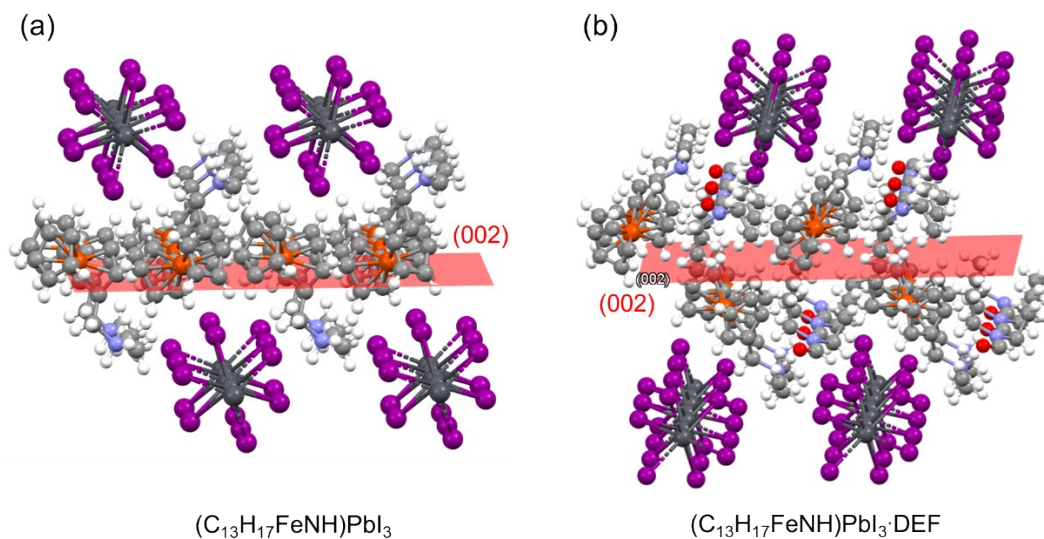

**Fig. S3** The (002) crystal plane of (C<sub>13</sub>H<sub>17</sub>FeNH)PbI<sub>3</sub> (a) and (C<sub>13</sub>H<sub>17</sub>FeNH)PbI<sub>3</sub>·DEF (b), respectively.

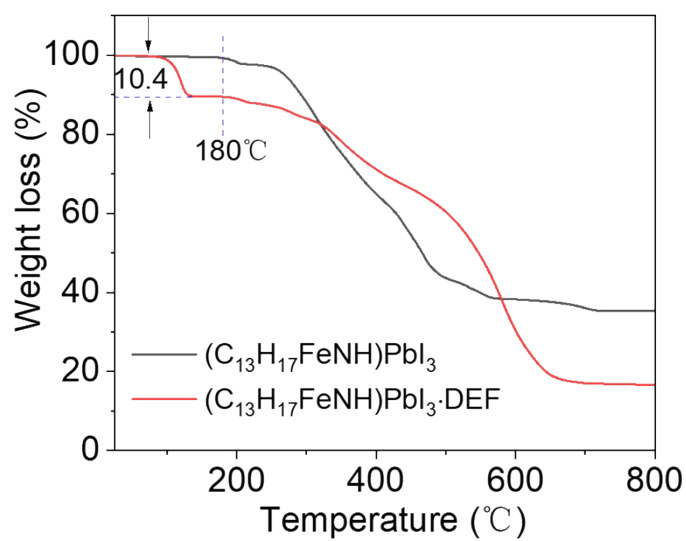

**Fig. S4** TGA curves of (C<sub>13</sub>H<sub>17</sub>FeNH)PbI<sub>3</sub> (a) and (C<sub>13</sub>H<sub>17</sub>FeNH)PbI<sub>3</sub>·DEF (b), respectively.

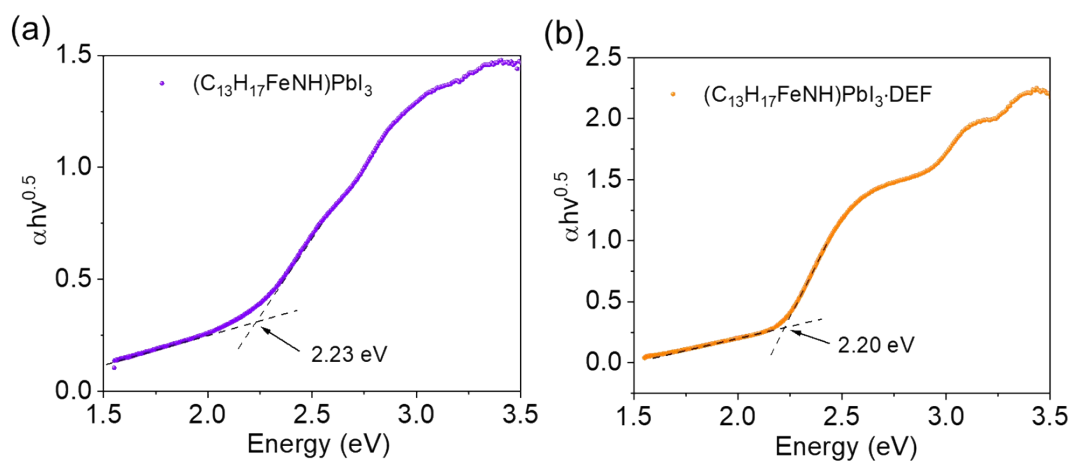

**Fig. S5** Tauc plots of  $(C_{13}H_{17}FeNH)PbI_3$  (a) and  $(C_{13}H_{17}FeNH)PbI_3 \cdot DEF$  (b), respectively.

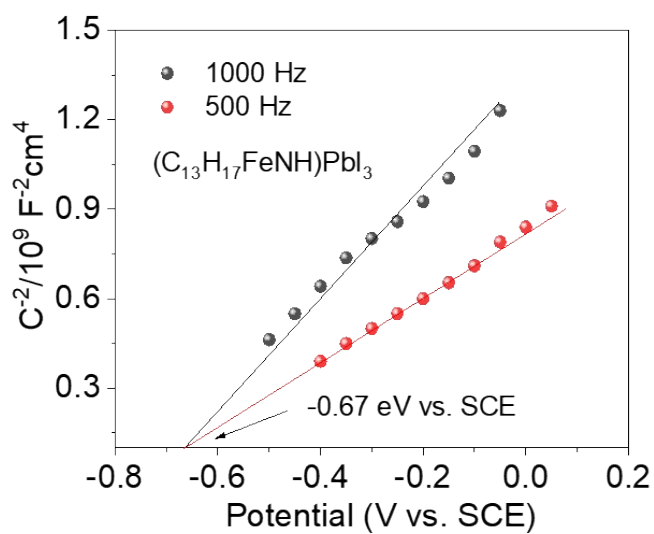

**Fig. S6** Mott-Schottky plot of  $(C_{13}H_{17}FeNH)PbI_3$  at 500 and 1000 Hz, respectively.

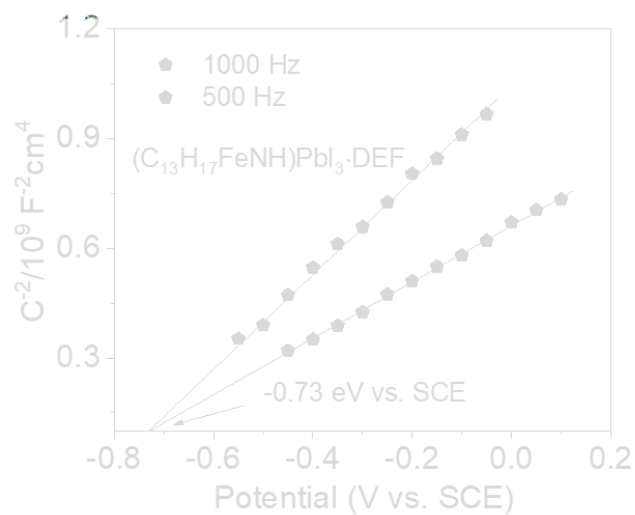

**Fig. S7** Mott-Schottky plot of  $(\text{C}_{13}\text{H}_{17}\text{FeNH})\text{PbI}_3\text{@DEF}$  at 500 and 1000 Hz, respectively.

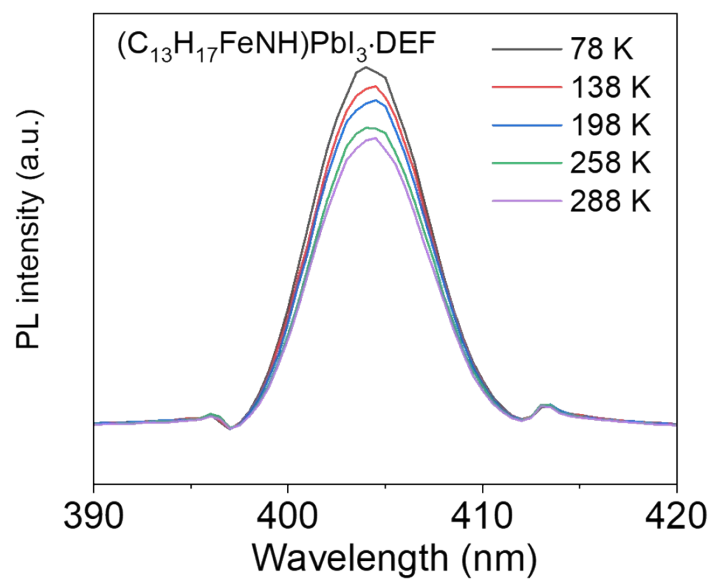

**Fig. S8** The temperature-dependent PL intensity plots of  $(\text{C}_{13}\text{H}_{17}\text{FeNH})\text{PbI}_3\text{@DEF}$ .

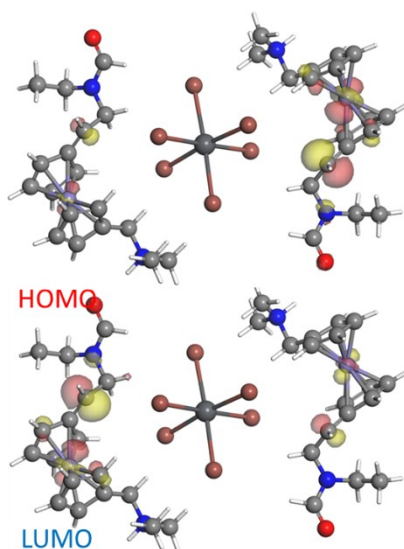

**Fig. S9.** HOMO and LUMO of (C<sub>13</sub>H<sub>17</sub>FeNH)PbI<sub>3</sub>·10DEF.

**Table S1.** Crystallographic data for (C<sub>13</sub>H<sub>17</sub>FeNH)PbI<sub>3</sub> and (C<sub>13</sub>H<sub>17</sub>FeNH)PbI<sub>3</sub>·10DEF.

| Empirical formula | C <sub>36</sub> H <sub>58</sub> Fe <sub>2</sub> I <sub>6</sub> N <sub>4</sub> O <sub>2</sub> Pb <sub>2</sub> | C <sub>13</sub> H <sub>18</sub> FeI <sub>3</sub> NPb |
|-------------------|--------------------------------------------------------------------------------------------------------------|------------------------------------------------------|
| Formula weight    | 1866.34                                                                                                      | 832.02                                               |
| Temperature/K     | 296.15                                                                                                       | 296.16                                               |
| Crystal system    | monoclinic                                                                                                   | monoclinic                                           |
| Space group       | <i>P</i> 2 <sub>1</sub> 11                                                                                   | <i>P</i> 112 <sub>1</sub>                            |
| <i>a</i> /Å       | 9.7288(14)                                                                                                   | 9.8348(10)                                           |
| <i>b</i> /Å       | 7.9947(11)                                                                                                   | 8.0487(7)                                            |
| <i>c</i> /Å       | 32.946(5)                                                                                                    | 24.407(2)                                            |
| <i>α</i> /°       | 90                                                                                                           | 90                                                   |

|                                           |                |                |
|-------------------------------------------|----------------|----------------|
| $\beta/^\circ$                            | 89.954(6)      | 90.033(4)      |
| $\gamma/^\circ$                           | 90             | 90             |
| Volume/ $\text{\AA}^3$                    | 2562.5(6)      | 1932.0(3)      |
| Z                                         | 2              | 4              |
| $\rho_{\text{calc}} \text{ g/cm}^3$       | 2.419          | 2.860          |
| $\mu/\text{mm}^{-1}$                      | 10.751         | 14.236         |
| $F(000)$                                  | 1704.0         | 1480.0         |
| Reflections collected                     | 92763          | 55997          |
| Independent reflections                   | 11695          | 6812           |
| $R_{\text{int}}$                          | 0.0300         | 0.0421         |
| Data/restraints/parameters                | 11695/1/477    | 6812/73/346    |
| Goodness-of-fit on $F^2$                  | 1.183          | 1.036          |
| Final $R$ indexes [ $I \geq 2\sigma(I)$ ] | $R_1 = 0.0154$ | $R_1 = 0.0596$ |
| Final $R$ indexes [all data]              | $R_1 = 0.0169$ | $R_1 = 0.0611$ |

**Table S2.** Fitting Parameters for TRPL curves of  $(\text{C}_{13}\text{H}_{17}\text{FeNH})\text{PbI}_3$  and

$(\text{C}_{13}\text{H}_{17}\text{FeNH})\text{PbI}_3 \otimes \text{DEF}$ .

| Perovskites                                                            | $\tau_1$ (ns) | $A_1$    | $\tau_2$ (ns) | $A_2$    | $\tau_{\text{ave}}$ (ns) |
|------------------------------------------------------------------------|---------------|----------|---------------|----------|--------------------------|
| $(\text{C}_{13}\text{H}_{17}\text{FeNH})\text{PbI}_3$                  | 0.353         | 8297.801 | 0.0131        | 571.882  | 0.352                    |
| $(\text{C}_{13}\text{H}_{17}\text{FeNH})\text{PbI}_3 \otimes \text{D}$ | 0.542         | 9346.319 | 0.00141       | 1029.285 | 0.541                    |
| EF                                                                     |               |          |               |          |                          |

**Table S3.** Comparison of various catalysts for photocatalytic oxidation of toluene.

| Photocatalyst                                                                         | Light source                               | Yield rate<br>( $\mu\text{mol g}^{-1} \text{ h}^{-1}$ ) | Selectivity (%) | Ref.      |
|---------------------------------------------------------------------------------------|--------------------------------------------|---------------------------------------------------------|-----------------|-----------|
| BiOBr/Bi <sub>2</sub> MoO <sub>6</sub>                                                | Blue LED,<br>$\lambda=450 \text{ nm}$      | 2134.28                                                 | 87.8            | 4         |
| Bi <sub>2</sub> MoO <sub>6</sub><br>nanosheets                                        | Xe lamp, $\lambda \geq$<br>400 nm          | 778.0                                                   | 96              | 5         |
| Bi <sub>2</sub> W <sub>x</sub> Mo <sub>1-x</sub> O <sub>6</sub>                       | Xe lamp, $\lambda \geq$<br>420 nm          | 1663                                                    | 91              | 6         |
| TiO <sub>2</sub> /Bi <sub>2</sub> MoO <sub>6</sub>                                    | 300 W Xe<br>lamp, $\lambda \geq 400$<br>nm | 1036                                                    | 97              | 7         |
| (110) Facet-<br>Exposed BiOBr                                                         | 300 W Xe-<br>lamp                          | 1623                                                    | 91              | 8         |
| Bi <sub>2</sub> MoO <sub>6</sub> -<br>Bi <sub>2</sub> Mo <sub>3</sub> O <sub>12</sub> | Xe lamp, $\lambda \geq$<br>400 nm          | 508                                                     | 98.5            | 9         |
| BiOBr/TiO <sub>2</sub>                                                                | Xe lamp, $\lambda \geq$<br>420 nm          | 1064                                                    | 91              | 10        |
| Cs <sub>3</sub> Bi <sub>2</sub> Br <sub>9</sub>                                       | Xe lamp                                    | 470                                                     | $\geq 88$       | 11        |
| (C <sub>13</sub> H <sub>17</sub> FeNH)PbI <sub>3</sub>                                | Xe lamp, $\lambda \geq$<br>420 nm          | 1600                                                    | 95.3            | This work |

## References

- [1] Guo, K.-K.; Yang, Y.-L.; Dong, S.-M.; Li, F.-Y.; Jiang, X.-Y.; Xu, L. Decomposition-Reassembly Synthesis of a Silverton-Type Polyoxometalate 3D Framework: Semiconducting Properties and Photocatalytic Applications. *Inorg. Chem.* 2022, 61, 6411-6420.
- [2] Dolomanov, O. V.; Bourhis, L. J.; Gildea, R. J.; Howard, J. A. K.; Puschmann, H. OLEX2: a complete structure solution, refinement and analysis program. *J. Appl. Crystallogr.* 2009, 42, 339-341.
- [3] Bourhis, L. J.; Dolomanov, O. V.; Gildea, R. J.; Howard, J. A. K.; Puschmann, H. The anatomy of a comprehensive constrained, restrained refinement program for the modern computing environment-Olex2 dissected. *Acta Crystallogr., Sect. A: Found. Adv.* 2015, A71, 59-75.
- [4] Gu, S.; Li, C.; Lin, X.; Lin, X.; Xiao Y.; Zhao, X.; Nan, J.; Xiao, X. In situ growth of bismuth oxybromide/bismuth molybdate 2D/2D Z-scheme heterojunctions with rich interfacial oxygen vacancies for photocatalytic benzylic C(sp<sup>3</sup>)-H bond activation. *J. Colloid Interface Sci.* 2025, 682, 467-477.
- [5] Cai, K.; Lv, S.Y.; Song, L.N.; Chen, L.; He, J.; Chen, P.; Au, C.T.; Yin, S.F. Facile preparation of ultrathin Bi<sub>2</sub>MoO<sub>6</sub> nanosheets for photocatalytic oxidation of toluene to benzaldehyde under visible light irradiation, *J. Solid State Chem.* 2019, 269, 145-150.

- [6] Zhang, K.F.; Chen, H. X.; Liu, Y. X.; Deng, J. G.; Jing, L.; Rastegarpanah, A. L.; Pei, W.B.; Han, Z.; Dai, H. X. Two-dimensional  $\text{Bi}_2\text{W}_x\text{Mo}_{1-x}\text{O}_6$  solid solution nanosheets for enhanced photocatalytic toluene oxidation to benzaldehyde, *Appl. Catal. B-Environ*, 2022, 315, 121545.
- [7] Song, L. N.; Ding, F.; Yang, Y. K.; Ding, D.; Chen, L.; Au, C. T.; Yin, S. F.; Synthesis of  $\text{TiO}_2/\text{Bi}_2\text{MoO}_6$  Composite for Partial Oxidation of Aromatic Alkanes under Visible-Light Illumination, *ACS Sustain. Chem. Eng.* 2018, 6 17044-17050.
- [8] Zhou, G. F.; Lei, B.; Dong, F. Lewis Acid Sites in (110) Facet-Exposed  $\text{BiOBr}$  Promote C-H Activation and Selective Photocatalytic Toluene Oxidation, *ACS Catal.* 2024, 14, 4791-4798.
- [9] Song, L. N.; Chen, L.; He, J.; Chen, P.; Zeng, H. K.; Au, C.T.; Yin, S. F. The first synthesis of Bi self-doped  $\text{Bi}_2\text{MoO}_6\text{-Bi}_2\text{Mo}_3\text{O}_{12}$  composites and their excellent photocatalytic performance for selective oxidation of aromatic alkanes under visible light irradiation, *Chem. Commun.* 2017, 53, 6480-6483.
- [10] Yuan, R. S.; Fan, S. L.; Zhou, H. X.; Ding, Z. X.; Lin, S.; Li, Z. H.; Zhang, Z. Z.; Xu, C.; Wu, L.; Wang, X. X.; Fu, X. Z. Chlorine-Radical-Mediated Photocatalytic Activation of C-H Bonds with Visible Light, *Angew. Chem. Int. Edit.* 2013, 52, 1035-1039.
- [11] Dai, Y.T.; Tüysüz, H. Rapid Acidic Media Growth of  $\text{Cs}_3\text{Bi}_2\text{Br}_9$  Halide Perovskite Platelets for Photocatalytic Toluene Oxidation, *Sol. Rrl.* 2021, 5, 2100265.
